# Supplementary material
Source: Springer Nature journal article supplement (https://www.springermedizin.de/resource/supplementary/12969_2012_981_MOESM2_ESM.pdf/9589144)
Supplement: MOESM2 [file 9589144]

**(a)**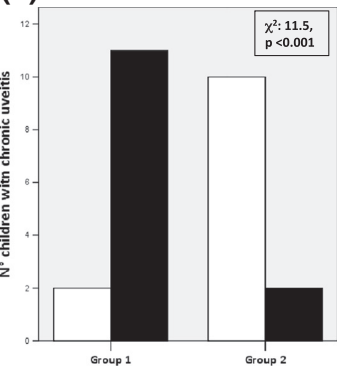

□ Not improved visual acuity

■ Improved visual acuity

**(b)**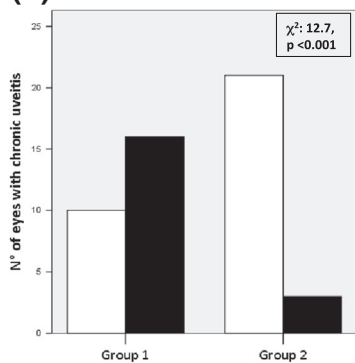

N° of eyes with chronic uveitis

**(d)**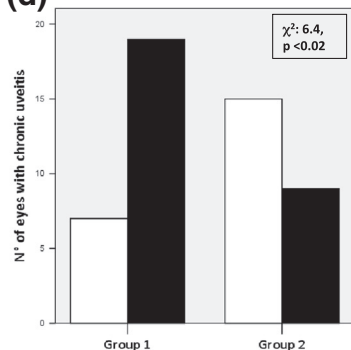

N° of eyes with chronic uveitis

**(c)**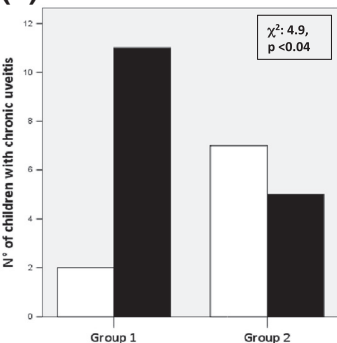

□ Abnormal visual acuity

■ Normal visual acuity
